# Supplementary material
Source: PubMed Central journal article supplement (PMC3138292)
Supplement: supp_M110.198267_jbc.M110.198267-3.pdf [file supp_M110.198267_jbc.M110.198267-3.pdf]

| CPP-M  |            |            |             |
|--------|------------|------------|-------------|
|        | 80         | 90         | 100 109     |
| FGF12: | TPECKFKESV | FENYYVIYSS | TLYRQQESGR  |
| FGF14: | TPECKFKESV | FENYYVIYSS | MIYRQQESGR  |
| FGF13: | TPECKFKESV | FENYYVTYSS | MIYRQQQSGR  |
| FGF11: | TAECRFKECV | FENYYVLYAS | ALYRQR RSGR |
| FGF1 : | NEECLFLERL | EENHYNTYIS | KKHAEK      |
| FGF2 : | TDECFFFERL | ESNNYNTYRS | RKYT        |

**FIGURE S3. High homology at the CPP-M domain in the FGF family.** Amino acid sequences of FGF11 subfamily and other FGFs corresponding to amino acids 80-109 (CPP-M) of FGF12B are shown (2). Blue letters indicate hydrophobic amino acids. Hydrophilic amino acid residues are labeled in red letters and neutral amino acid residues are in black. CPP-M may be distributed from amino acid position 80-90 to 101-109.
