# Supplementary material
Source: PubMed Central journal article supplement (PMC3138292)
Supplement: supp_M110.198267_jbc.M110.198267-4.pdf [file supp_M110.198267_jbc.M110.198267-4.pdf]

A

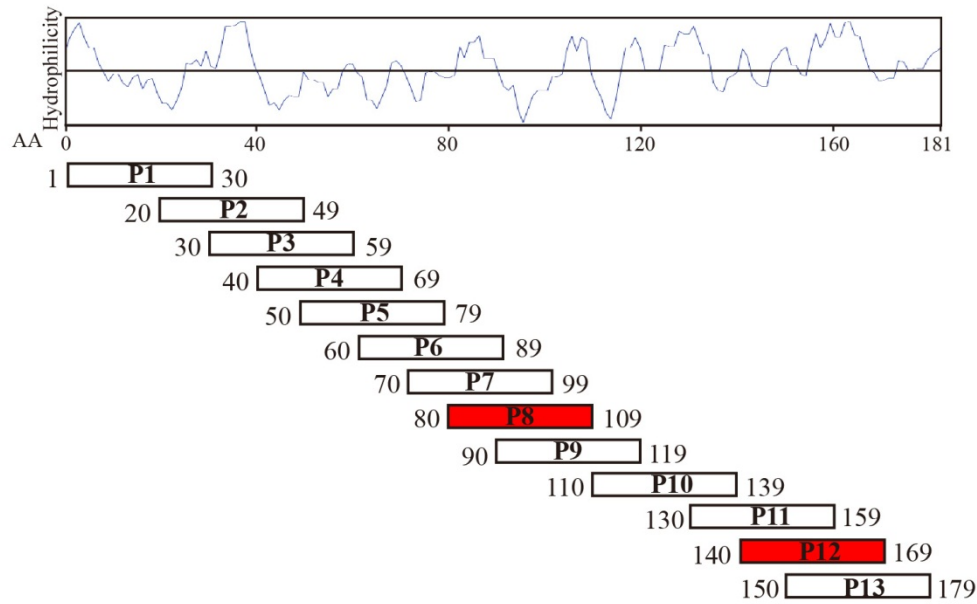

B

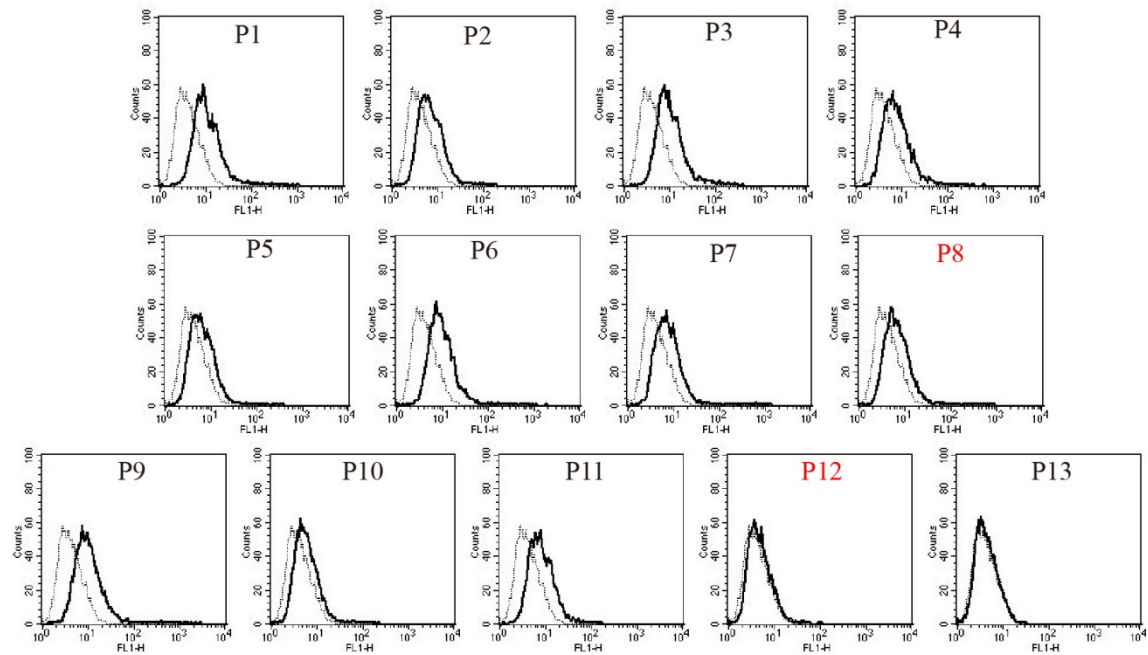

**FIGURE S4. Low affinity of the CPP-M and CPP-C domains to the cell surface of IEC6 cells.** A, Thirteen peptides containing 30 amino acid residues conjugated with fluorescein isothiocyanate (FITC) were synthesized based on the amino acid sequence of FGF12B. Peptides P10, P12 and P13 were hydrophilic and the other peptides were hydrophobic. B, IEC6 cells were incubated in PBS containing 10  $\mu$ g/ml of each FITC-labeled peptide and 0.2% BSA for 1 h at 4°C. The cells were washed twice with PBS containing 0.1% BSA, and subjected to flow cytometry to assess the intensity of cell surface fluorescence. The peptide P12 including CPP-C showed no affinity for IEC6 cells and the peptide P8 including CPP-M showed the lowest affinity. Most peptides had slight affinity to IEC6 cells because they were hydrophobic. However, there was no peptide with strong binding affinity to the cells.
